# Supplementary material
Source: MDPI journal article supplement (https://www.mdpi.com/2304-6740/7/10/116)
Supplement: s1 [file s1]

# Supplementary Materials: Structures and Properties of Dinitrosyl Iron and Cobalt Complexes Ligated by Bis(3,5-diisopropyl-1-pyrazolyl)methane

Haruka Kurihara, Ayuri Ohta and Kiyoshi Fujisawa

## Contents

|             |                                                                                                                                                                                                             |     |
|-------------|-------------------------------------------------------------------------------------------------------------------------------------------------------------------------------------------------------------|-----|
| Figure S1.  | Crystal structure of $[\text{Fe}(\text{NO})_2(\text{L}^{\text{I}})](\text{BF}_4)$ .                                                                                                                         | S2  |
| Figure S2.  | Crystal structure of $[\text{Co}(\text{NO})_2(\text{L}^{\text{I}})](\text{BF}_4) \cdot \text{thf}$ .                                                                                                        | S2  |
| Figure S3.  | Crystal structure of $[\text{FeCl}_2(\text{L}^{\text{I}})] \cdot (\text{CH}_3)_2\text{CO}$ .                                                                                                                | S3  |
| Figure S4.  | Crystal structure of $[\text{Co}(\text{NO})_2(\text{L}^{\text{I}})] \cdot \text{thf}$ .                                                                                                                     | S3  |
| Figure S5.  | IR spectra of $[\text{Fe}(\text{NO})_2(\text{L}^{\text{I}})](\text{BF}_4)$ and $[\text{Co}(\text{NO})_2(\text{L}^{\text{I}})](\text{BF}_4)$ (KBr).                                                          | S4  |
| Figure S6.  | IR spectra of $[\text{Fe}^{(15}\text{N}^{18}\text{O})_2(\text{L}^{\text{I}})](\text{BF}_4)$ and $[\text{Co}^{(15}\text{N}^{18}\text{O})_2(\text{L}^{\text{I}})](\text{BF}_4)$ ( $\text{CH}_2\text{Cl}_2$ ). | S4  |
| Figure S7.  | Far-IR spectra of $[\text{Fe}(\text{NO})_2(\text{L}^{\text{I}})](\text{BF}_4)$ and $[\text{Fe}^{(15}\text{N}^{18}\text{O})_2(\text{L}^{\text{I}})](\text{BF}_4)$ .                                          | S5  |
| Figure S8.  | Far-IR spectra of $[\text{Co}(\text{NO})_2(\text{L}^{\text{I}})](\text{BF}_4)$ and $[\text{Co}^{(15}\text{N}^{18}\text{O})_2(\text{L}^{\text{I}})](\text{BF}_4)$ .                                          | S5  |
| Figure S9.  | Far-IR spectra of $[\text{FeCl}_2(\text{L}^{\text{I}})](\text{BF}_4)$ (CsI pellet).                                                                                                                         | S6  |
| Figure S10. | UV-vis and diffuse reflectance spectra of $[\text{Fe}(\text{NO})_2(\text{L}^{\text{I}})](\text{BF}_4)$ .                                                                                                    | S6  |
| Figure S11. | UV-vis and diffuse reflectance spectra of $[\text{Co}(\text{NO})_2(\text{L}^{\text{I}})](\text{BF}_4)$ .                                                                                                    | S7  |
| Figure S12. | UV-vis and diffuse reflectance spectra of $[\text{FeCl}_2(\text{L}^{\text{I}})]$ .                                                                                                                          | S7  |
| Figure S13. | UV-vis spectra of $[\text{Co}(\kappa^2\text{-O}_2\text{NO})_2(\text{L}^{\text{I}})]$ and $[\text{Co}(\kappa^2\text{-O}_2\text{N})_2(\text{L}^{\text{I}})]$ .                                                | S8  |
| Figure S14. | EPR spectra of $[\text{Fe}(\text{NO})_2(\text{L}^{\text{I}})](\text{BF}_4)$ at 130 K.                                                                                                                       | S8  |
| Figure S15. | $^1\text{H}$ -NMR spectrum of $[\text{FeCl}_2(\text{L}^{\text{I}})]$ .                                                                                                                                      | S9  |
| Figure S16. | $^1\text{H}$ -NMR spectrum of $[\text{Co}(\text{NO})_3(\text{L}^{\text{I}})]$ .                                                                                                                             | S9  |
| Figure S17. | $^1\text{H}$ -NMR spectrum of $[\text{Co}(\text{NO})_2(\text{L}^{\text{I}})]$ .                                                                                                                             | S10 |
| Figure S18. | IR spectral changes under argon atmospheres at room temperature (KBr).                                                                                                                                      | S10 |
| Figure S19. | IR spectral changes during the $\text{O}_2$ reaction of $[\text{Fe}(\text{NO})_2(\text{L}^{\text{I}})](\text{BF}_4)$ in solution ( $\text{CH}_2\text{Br}_2$ ).                                              | S11 |
| Figure S20. | IR spectral changes during the $\text{O}_2$ reaction of $[\text{Fe}(\text{NO})_2(\text{L}^{\text{I}})](\text{BF}_4)$ in the solid ( $\text{CH}_2\text{Br}_2$ ).                                             | S11 |
| Figure S21. | IR spectral changes during the $\text{O}_2$ reaction of $[\text{Co}(\text{NO})_2(\text{L}^{\text{I}})](\text{BF}_4)$ in solution ( $\text{CH}_2\text{Br}_2$ ).                                              | S12 |
| Figure S22. | IR spectral changes during the $\text{O}_2$ reaction of $[\text{Co}(\text{NO})_2(\text{L}^{\text{I}})](\text{BF}_4)$ in the solid ( $\text{CH}_2\text{Br}_2$ ).                                             | S12 |
| Figure S23. | $^1\text{H}$ -NMR spectrum of the products of the $\text{O}_2$ reaction of $[\text{Co}(\text{NO})_2(\text{L}^{\text{I}})](\text{BF}_4)$ in solution.                                                        | S13 |
| Figure S24. | $^1\text{H}$ -NMR spectrum of the products of the $\text{O}_2$ reaction of $[\text{Co}(\text{NO})_2(\text{L}^{\text{I}})](\text{BF}_4)$ in the solid.                                                       | S13 |

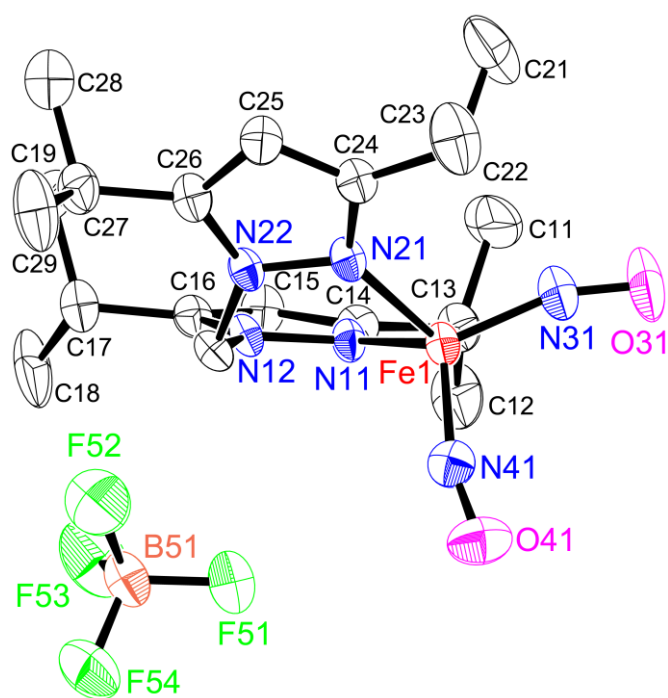Figure S1. Crystal structure of  $[\text{Fe}(\text{NO})_2(\text{L1}'')](\text{BF}_4)$ .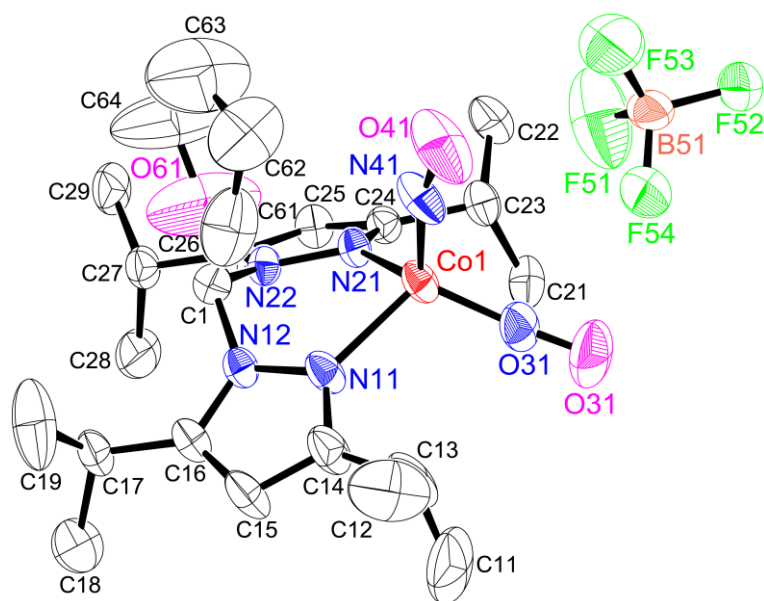Figure S2. Crystal structure of  $[\text{Co}(\text{NO})_2(\text{L1}'')](\text{BF}_4) \cdot \text{thf}$ .

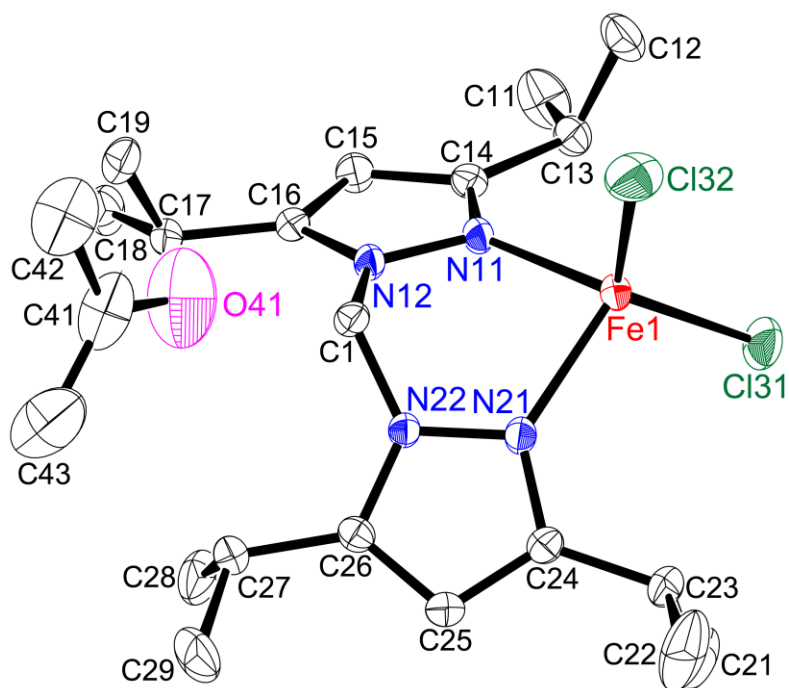

Figure S3. Crystal structure of  $[\text{FeCl}_2(\text{L1}'')](\text{CH}_3)_2\text{CO}$ .

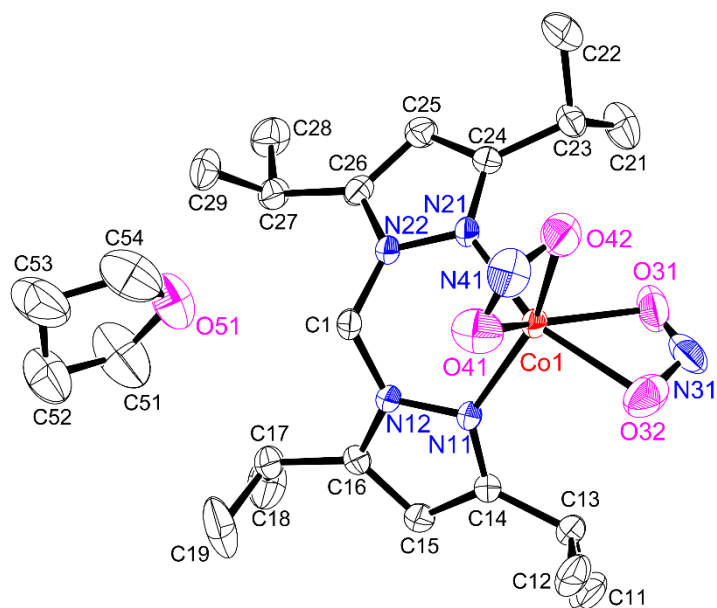

Figure S4. Crystal structure of  $[\text{Co}(\text{NO}_2)_2(\text{L1}'')]\cdot\text{thf}$ .

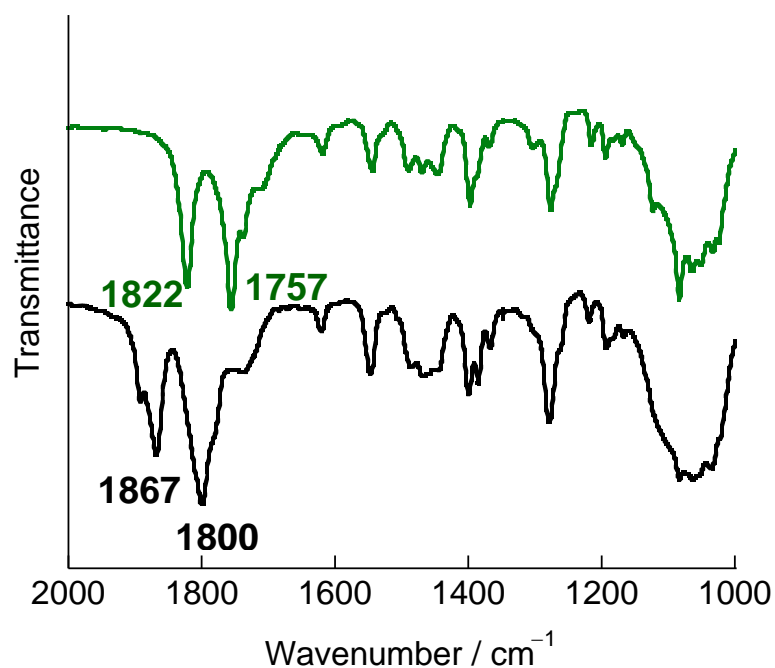

Figure S5. IR spectra of  $[\text{Fe}(\text{NO})_2(\text{L1}'')](\text{BF}_4)$  (green, top) and  $[\text{Co}(\text{NO})_2(\text{L1}'')](\text{BF}_4)$  (black, bottom) in the solid state (KBr).

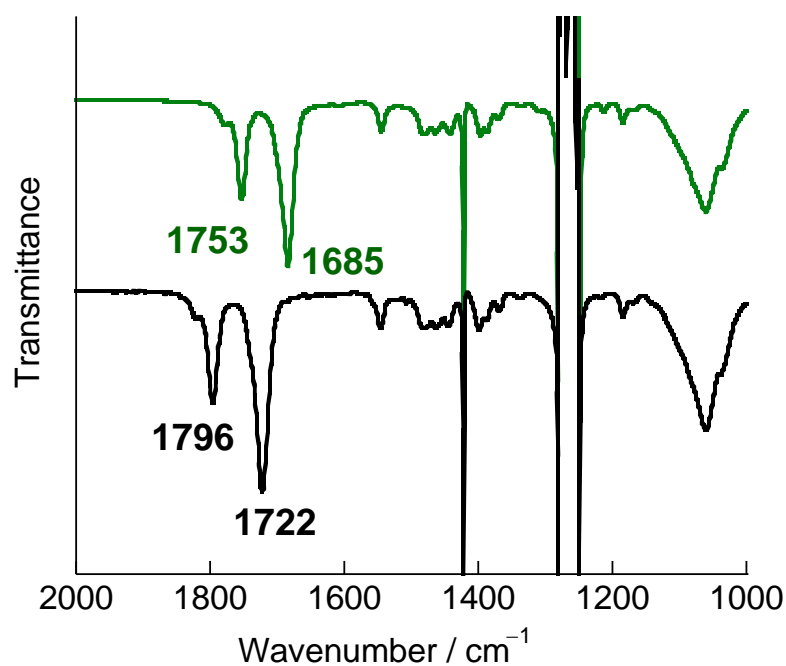

Figure S6. IR spectra of  $[\text{Fe}(^{15}\text{N}^{18}\text{O})_2(\text{L1}'')](\text{BF}_4)$  (green, top) and  $[\text{Co}(^{15}\text{N}^{18}\text{O})_2(\text{L1}'')](\text{BF}_4)$  (black, bottom) in solution ( $\text{CH}_2\text{Cl}_2$ ).

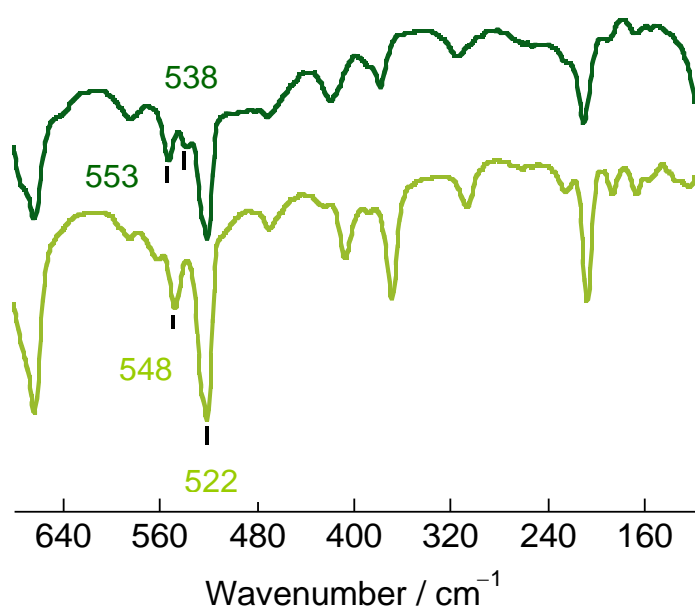

Figure S7. Far-IR spectra of  $[\text{Fe}(\text{NO})_2(\text{L1''})](\text{BF}_4)$  (top, deep green) and  $[\text{Fe}^{15}\text{N}^{18}\text{O})_2(\text{L1''})](\text{BF}_4)$  (bottom, yellow green).

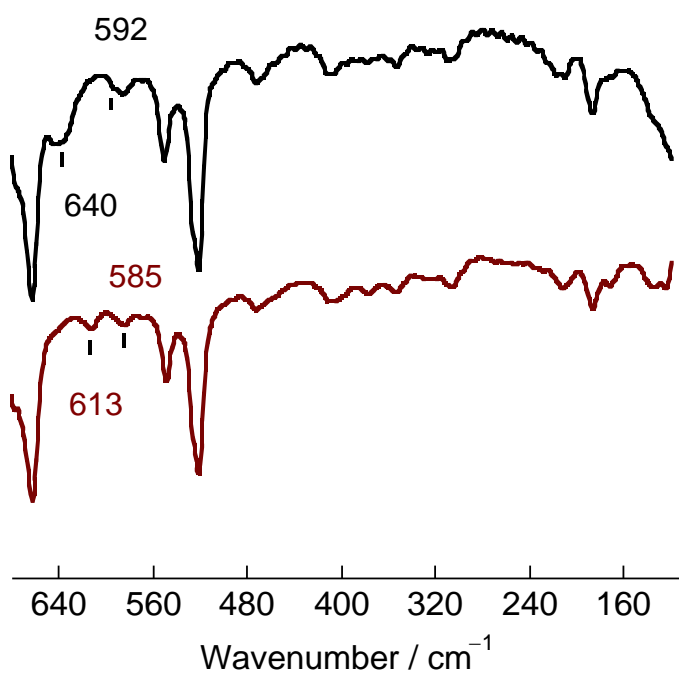

Figure S8. Far-IR spectra of  $[\text{Co}(\text{NO})_2(\text{L1''})](\text{BF}_4)$  (top, black) and  $[\text{Co}^{15}\text{N}^{18}\text{O})_2(\text{L1''})](\text{BF}_4)$  (bottom, brown).

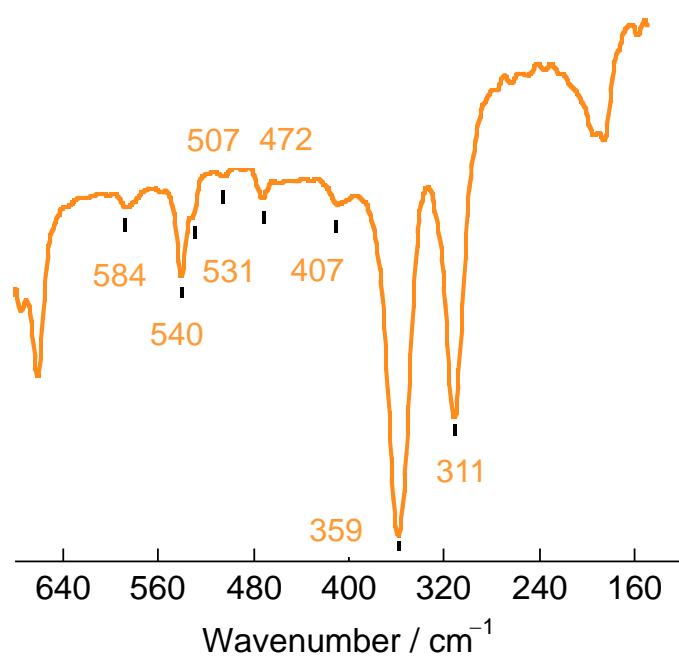

Figure S9. Far-IR spectra of  $[\text{FeCl}_2(\text{L1}'')](\text{BF}_4)$  (CsI pellet).

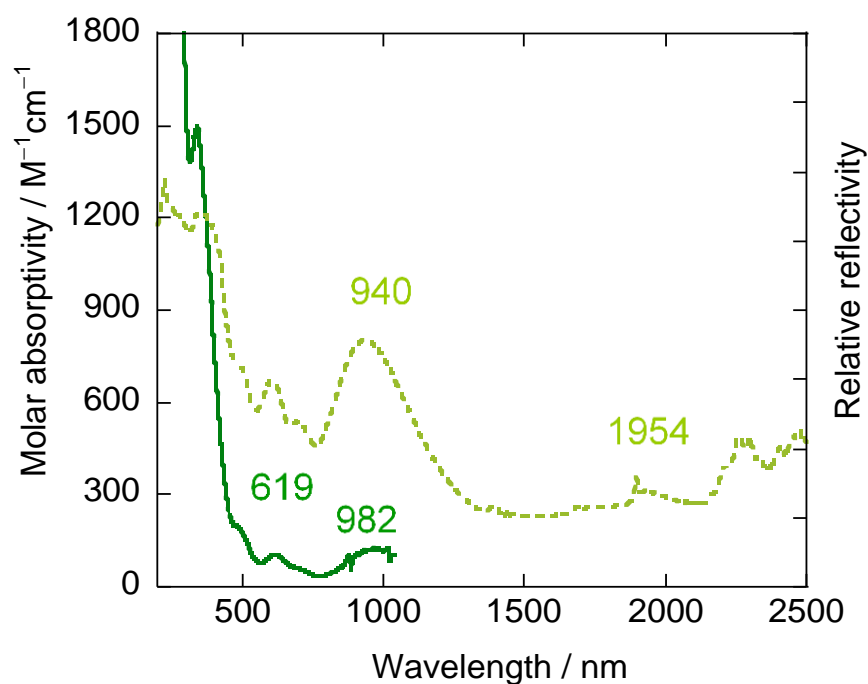

Figure S10. UV-vis (solid line, in  $\text{CH}_2\text{Cl}_2$ ) and diffuse reflectance (dotted line, solid) spectra of  $[\text{Fe}(\text{NO})_2(\text{L1}'')](\text{BF}_4)$ .

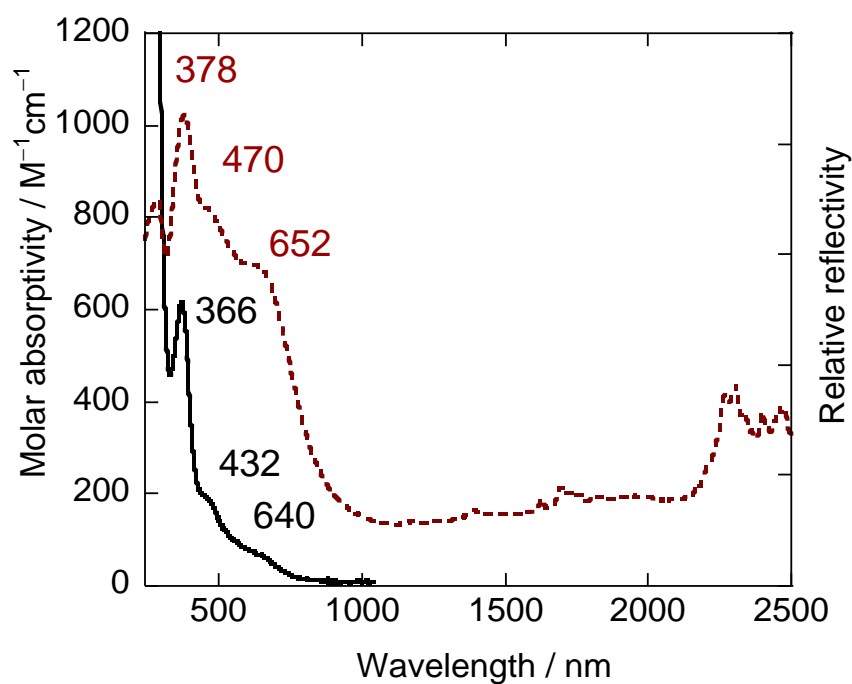

Figure S11. UV-vis (solid line, in  $\text{CH}_2\text{Cl}_2$ ) and diffuse reflectance (dotted line) spectra of  $[\text{Co}(\text{NO})_2(\text{L1}'')](\text{BF}_4)$ .

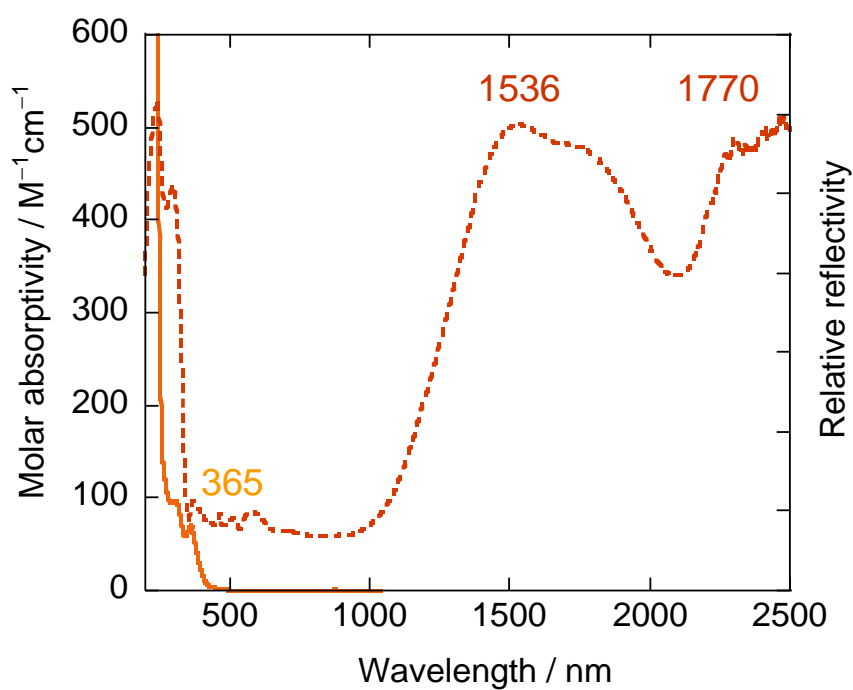

Figure S12. UV-vis (solid line, in  $\text{CH}_2\text{Cl}_2$ ) and diffuse reflectance (dotted line) spectra of  $[\text{FeCl}_2(\text{L1}'')]$ .

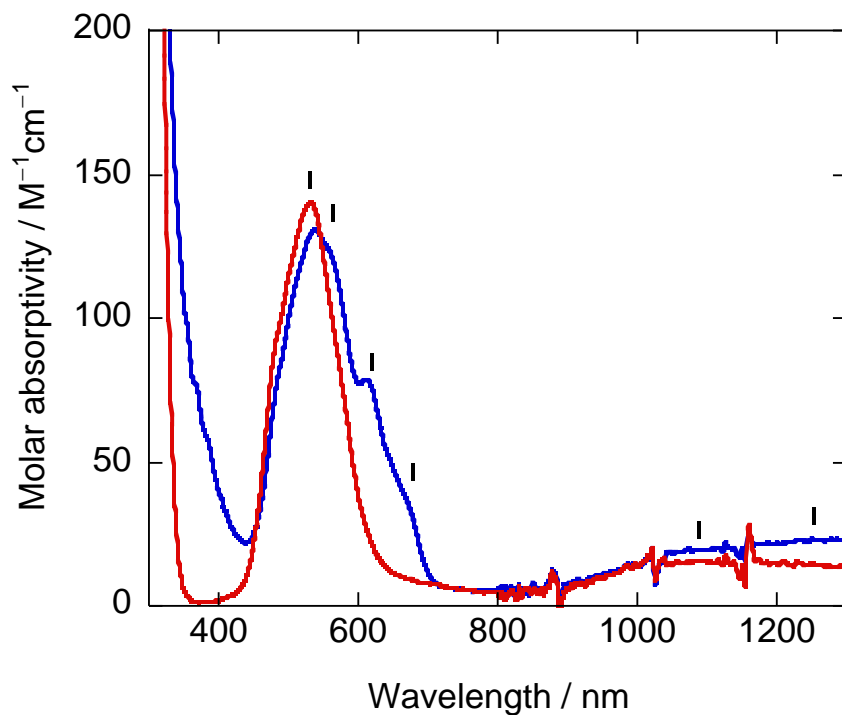

Figure S13. UV-vis spectra of  $[\text{Co}(\kappa^2\text{-O}_2\text{NO})_2(\text{L1}'')]$  (red) and  $[\text{Co}(\kappa^2\text{-O}_2\text{N})_2(\text{L1}'')]$  (blue) in  $\text{CH}_2\text{Cl}_2$ .

(a) solid state

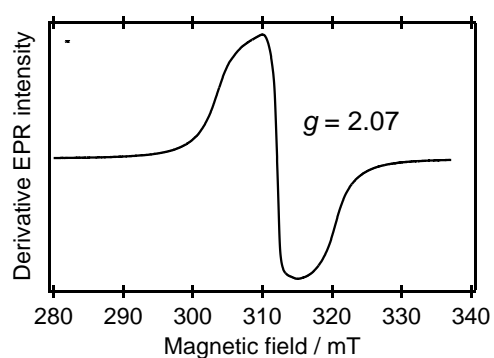

(b) solution state

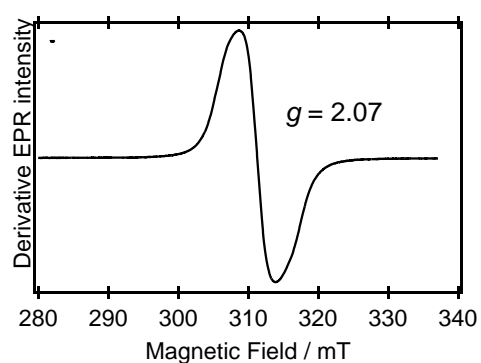

Figure S14. EPR spectra of  $[\text{Fe}(\text{NO})_2(\text{L1}'')](\text{BF}_4)$  in solid (left) and frozen dichloromethane solution (right) at 130 K.



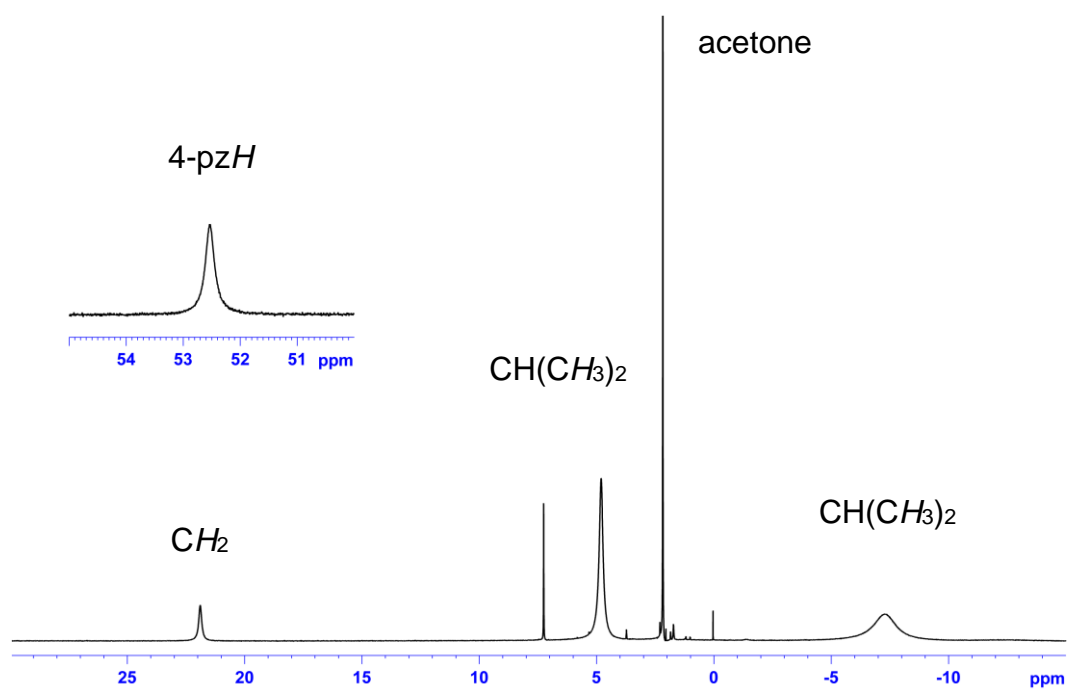Figure S15.  $^1\text{H}$ -NMR spectrum of  $[\text{FeCl}_2(\text{L1}'')]$  in  $\text{CDCl}_3$  at room temperature.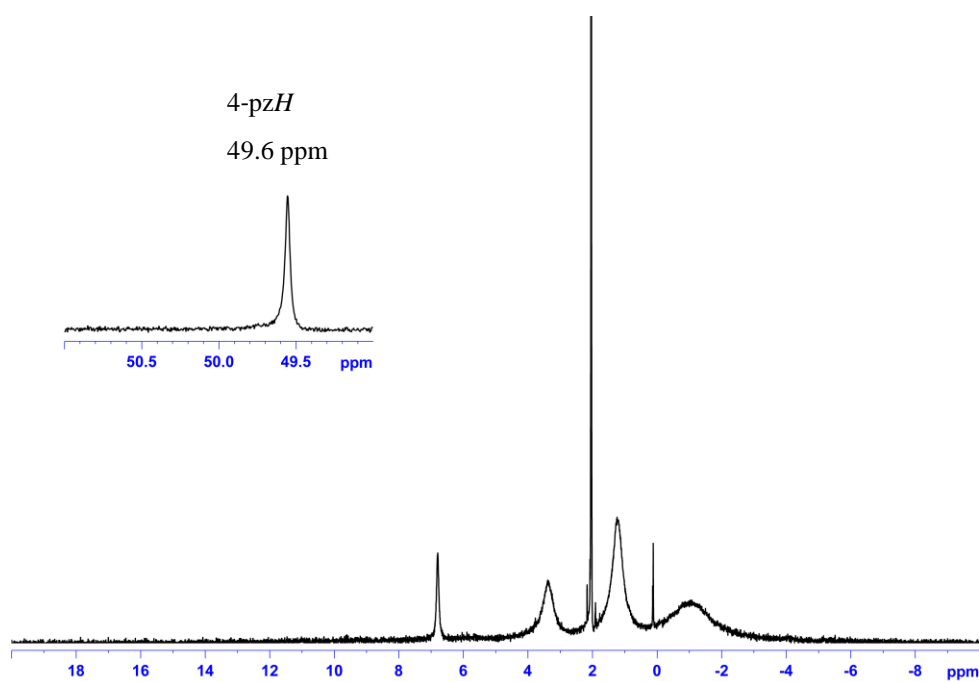Figure S16.  $^1\text{H}$ -NMR spectrum of  $[\text{Co}(\kappa^2\text{-O}_2\text{NO})_2(\text{L1}'')]$  in  $(\text{CD}_3)_2\text{CO}$  at room temperature.

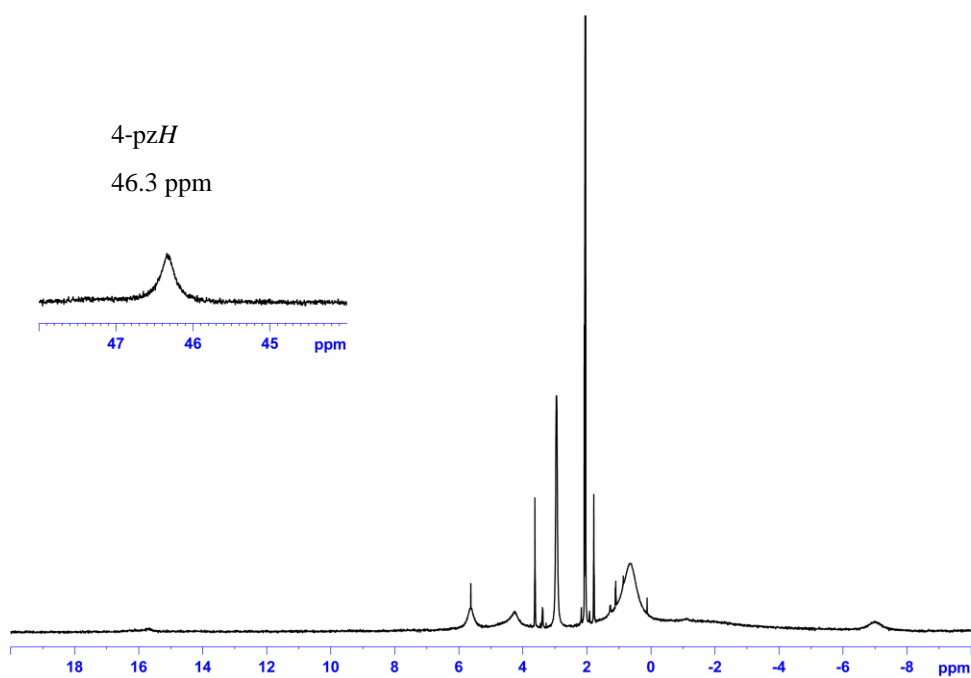

Figure S17.  $^1\text{H}$ -NMR spectrum of  $[\text{Co}(\kappa^2\text{-O}_2\text{N})_2(\text{L1}'')]$  in  $(\text{CD}_3)_2\text{CO}$  at room temperature.

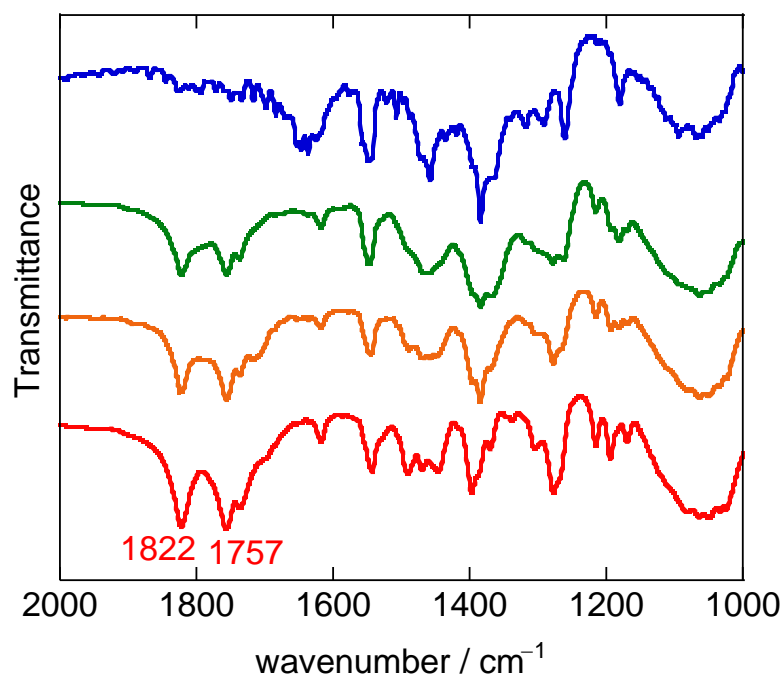

Figure S18. IR spectral changes of  $[\text{Fe}(\text{NO})_2(\text{L1}'')](\text{BF}_4)$  under argon atmospheres at room temperature (KBr) (red: start, orange: one week after, green: two weeks after, blue: three weeks after).

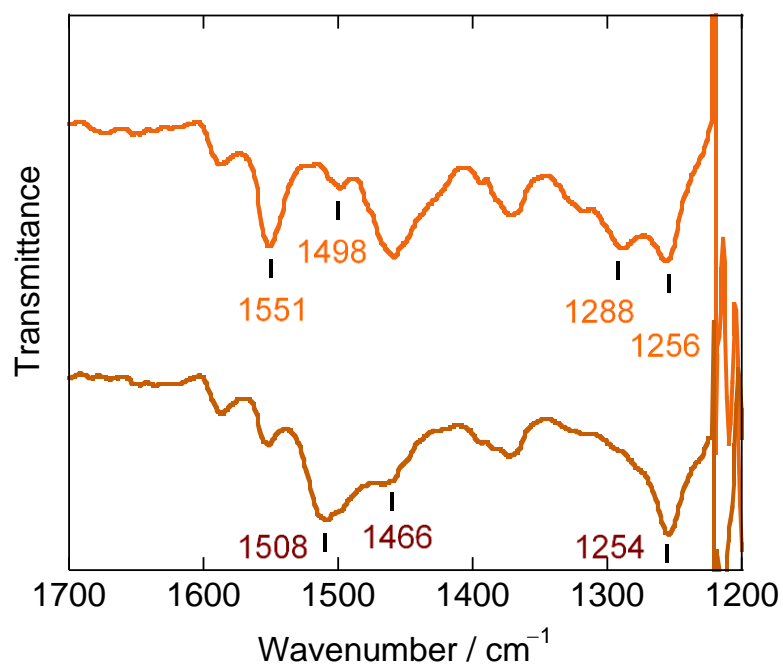

Figure S19. IR spectral changes during the  $\text{O}_2$  reaction of  $[\text{Fe}(\text{NO})_2(\text{L1}'')](\text{BF}_4)$  in solution (RT,  $\text{CH}_2\text{Br}_2$ ). (top: normal NO and bottom: isotope labelled).

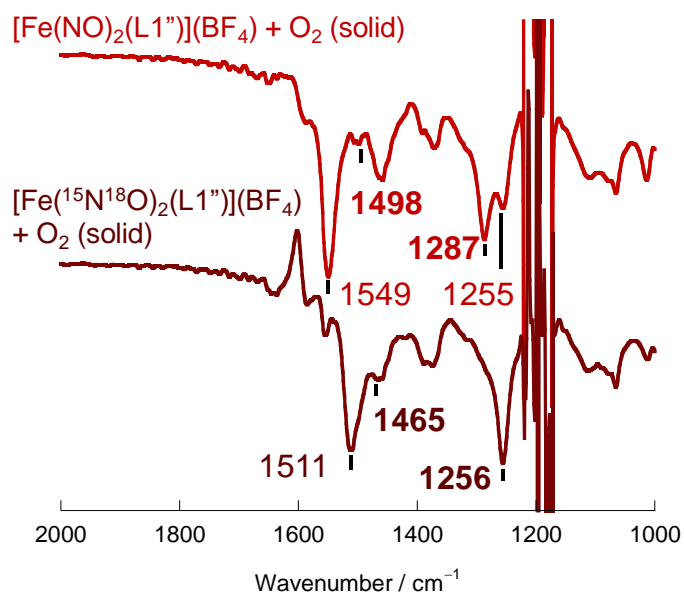

Figure S20. IR spectral changes during the  $\text{O}_2$  reaction of  $[\text{Fe}(\text{NO})_2(\text{L1}'')](\text{BF}_4)$  in the solid (RT,  $\text{CH}_2\text{Br}_2$ ). (top: normal NO and bottom: isotope labelled).

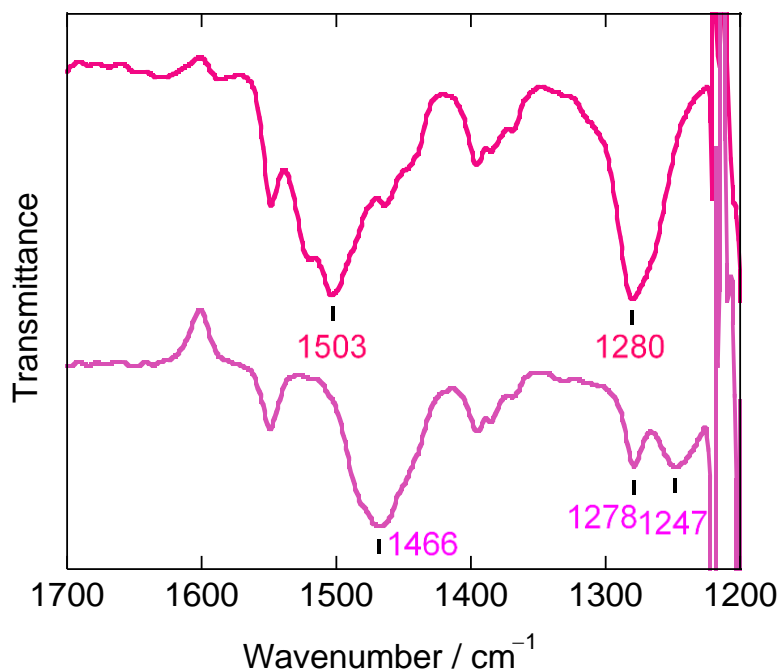

Figure 21. IR spectral changes during the dioxygen reaction of  $[\text{Co}(\text{NO})_2(\text{L1}'')](\text{BF}_4)$  in solution (RT,  $\text{CH}_2\text{Br}_2$ ). (top: normal NO and bottom: isotope labelled).

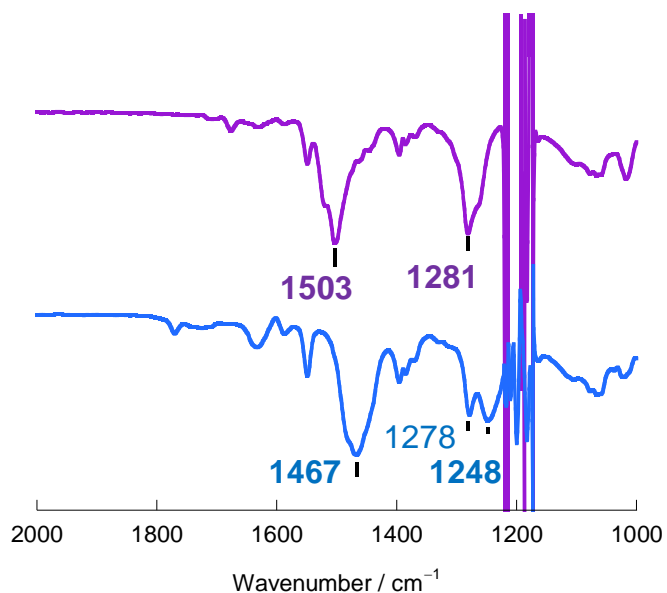

Figure S22. IR spectral changes during the  $\text{O}_2$  reaction of  $[\text{Co}(\text{NO})_2(\text{L1}'')](\text{BF}_4)$  in the solid (RT,  $\text{CH}_2\text{Br}_2$ ). (top: normal NO and bottom: isotope labelled).

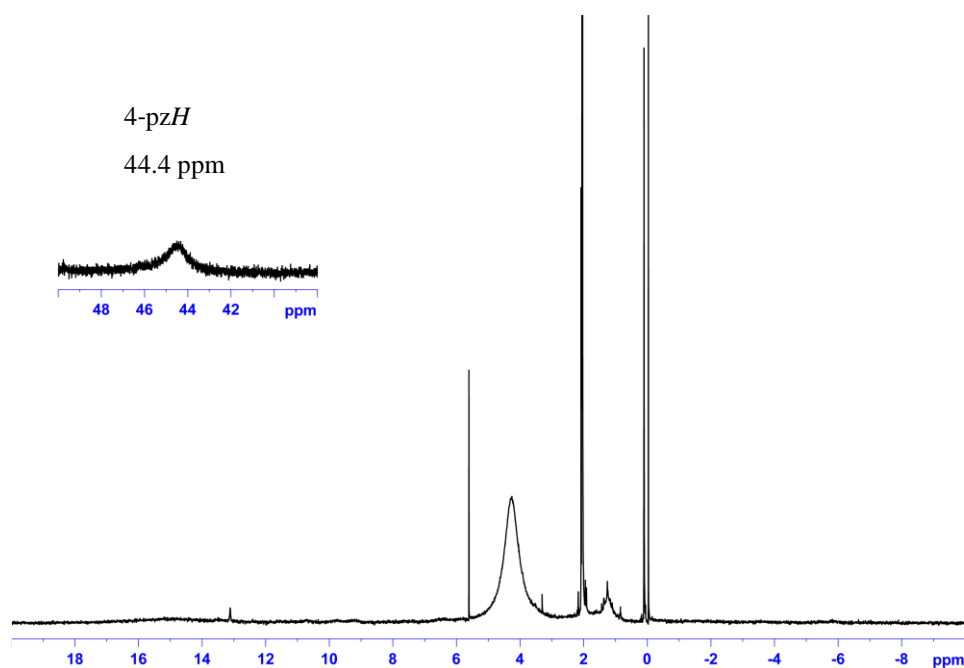

Figure S23.  $^1\text{H}$ -NMR spectrum of the products of the  $\text{O}_2$  reaction of  $[\text{Co}(\text{NO})_2(\text{L1}'')](\text{BF}_4)$  in solution. Taken in  $(\text{CD}_3)_2\text{CO}$  at room temperature.

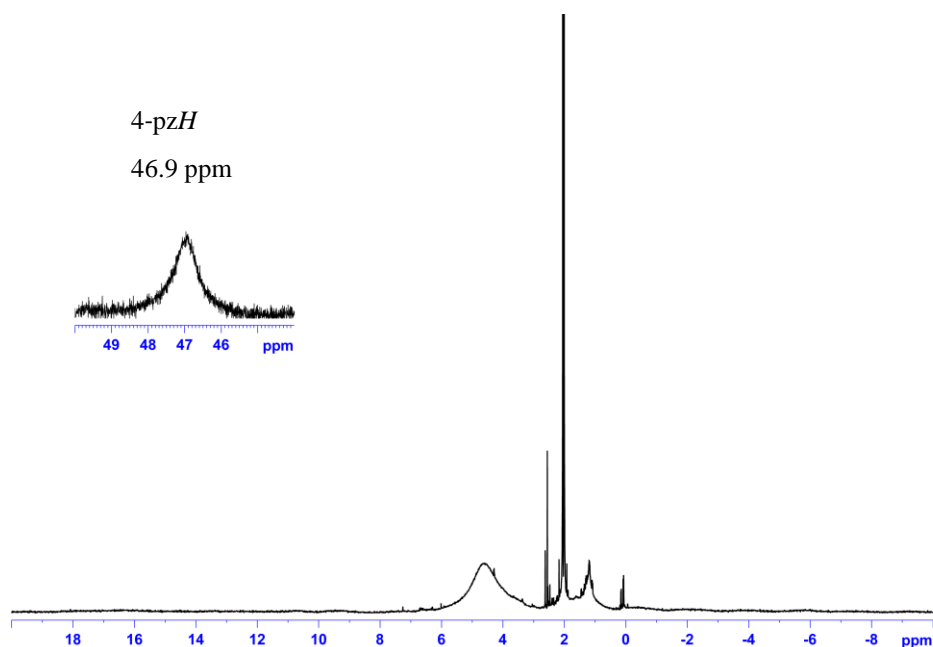

Figure S24.  $^1\text{H}$ -NMR spectrum of the products of the  $\text{O}_2$  reaction of  $[\text{Co}(\text{NO})_2(\text{L1}'')](\text{BF}_4)$  in the solid. Taken in  $(\text{CD}_3)_2\text{CO}$  at room temperature.
