# Supplementary material
Source: MDPI journal article supplement (https://www.mdpi.com/2304-6740/7/10/116)
Supplement: s1 [file s1]

# checkCIF (basic structural check) running

Checking for embedded fcf data in CIF ...

Found embedded fcf data in CIF. Extracting fcf data from uploaded CIF, please wait .....

## checkCIF/PLATON (basic structural check)

Structure factors have been supplied for datablock(s) CoNO22L12, CoNO2L12BF4, CoNO32L12, FeCl2L12, FeNO2L12BF4

THIS REPORT IS FOR GUIDANCE ONLY. IF USED AS PART OF A REVIEW PROCEDURE FOR PUBLICATION, IT SHOULD NOT REPLACE THE EXPERTISE OF AN EXPERIENCED CRYSTALLOGRAPHIC REFEREE.

No syntax errors found.

Please wait while processing ....

[CIF dictionary](#)

[Interpreting this report](#)

[Structure factor report](#)

### Datablock: FeNO2L12BF4

|                 |                                              |                    |
|-----------------|----------------------------------------------|--------------------|
| Bond precision: | C-C = 0.0080 Å                               | Wavelength=0.71075 |
| Cell:           | a=13.093 (3)    b=19.318 (5)    c=10.174 (3) |                    |
|                 | alpha=90    beta=90.349 (7)    gamma=90      |                    |
| Temperature:    | 178 K                                        |                    |

  

|                | Calculated             | Reported              |
|----------------|------------------------|-----------------------|
| Volume         | 2573.3 (12)            | 2573.3 (12)           |
| Space group    | C c                    | C 1 c 1               |
| Hall group     | C -2yc                 | C -2yc                |
| Moiety formula | C19 H32 Fe N6 O2, B F4 | C19 H32 B F4 Fe N6 O2 |
| Sum formula    | C19 H32 B F4 Fe N6 O2  | C19 H32 B F4 Fe N6 O2 |
| Mr             | 519.17                 | 519.15                |
| Dx, g cm-3     | 1.340                  | 1.340                 |
| Z              | 4                      | 4                     |
| Mu (mm-1)      | 0.641                  | 0.640                 |
| F000           | 1084.0                 | 1084.0                |
| F000'          | 1085.90                |                       |
| h, k, lmax     | 16, 25, 13             | 17, 25, 13            |
| Nref           | 5916 [ 2964 ]          | 4870                  |
| Tmin, Tmax     | 0.970, 0.981           | 0.881, 0.981          |
| Tmin'          | 0.863                  |                       |

Correction method= # Reported T Limits: Tmin=0.881  
Tmax=0.981 AbsCorr = NUMERICAL  
Data completeness= 1.64/0.82    Theta(max)= 27.503  
R(reflections)= 0.0473 ( 4507)    wR2(reflections)= 0.1365 ( 4870)  
S = 1.042    Npar= 298

The following ALERTS were generated. Each ALERT has the format

**test-name\_ALERT\_alert-type\_alert-level.**

Click on the hyperlinks for more details of the test.

#### Alert level B

[PLAT987 ALERT 1 B](#) The Flack x is >> 0 - Do a BASF/TWIN Refinement    Please Check

#### Alert level C

[PLAT094 ALERT 2 C](#) Ratio of Maximum / Minimum Residual Density ....    3.15 Report

[PLAT220 ALERT 2 C](#) Non-Solvent Resd 1 C    Ueq(max)/Ueq(min) Range    4.0 Ratio

[PLAT242 ALERT 2 C](#) Low 'MainMol' Ueq as Compared to Neighbors of    C13 Check

And 3 other PLAT242 Alerts

|                                   |                                                  |                                           |            |
|-----------------------------------|--------------------------------------------------|-------------------------------------------|------------|
| <a href="#">PLAT242 ALERT 2 C</a> | Low                                              | 'MainMol' Ueq as Compared to Neighbors of | C17 Check  |
| <a href="#">PLAT242 ALERT 2 C</a> | Low                                              | 'MainMol' Ueq as Compared to Neighbors of | C23 Check  |
| <a href="#">PLAT242 ALERT 2 C</a> | Low                                              | 'MainMol' Ueq as Compared to Neighbors of | C27 Check  |
| <a href="#">PLAT341 ALERT 3 C</a> | Low                                              | Bond Precision on C-C Bonds .....         | 0.008 Ang. |
| <a href="#">PLAT910 ALERT 3 C</a> | Missing # of FCF Reflection(s) Below Theta(Min). |                                           | 5 Note     |
| <a href="#">PLAT911 ALERT 3 C</a> | Missing FCF Refl Between Thmin & STh/L=          | 0.600                                     | 2 Report   |
| <a href="#">PLAT915 ALERT 3 C</a> | No Flack x Check Done: Low Friedel Pair Coverage |                                           | 65 %       |

### Alert level G

|                                   |                                                  |               |
|-----------------------------------|--------------------------------------------------|---------------|
| <a href="#">PLAT012 ALERT 1 G</a> | N.O.K. _shelx_res_checksum Found in CIF .....    | Please Check  |
| <a href="#">PLAT042 ALERT 1 G</a> | Calc. and Reported MoietyFormula Strings Differ  | Please Check  |
| <a href="#">PLAT072 ALERT 2 G</a> | SHELXL First Parameter in WGHT Unusually Large   | 0.10 Report   |
| <a href="#">PLAT112 ALERT 2 G</a> | ADDSYM Detects New (Pseudo) Symm. Elem           | 21 93 %Fit    |
| <a href="#">PLAT112 ALERT 2 G</a> | ADDSYM Detects New (Pseudo) Symm. Elem           | m 93 %Fit     |
| <a href="#">PLAT113 ALERT 2 G</a> | ADDSYM Suggests Possible Pseudo/New Space Group  | Cmc21 Check   |
| <a href="#">PLAT244 ALERT 4 G</a> | Low 'Solvent' Ueq as Compared to Neighbors of    | B51 Check     |
| <a href="#">PLAT794 ALERT 5 G</a> | Tentative Bond Valency for Fe (III)              | 3.89 Info     |
| <a href="#">PLAT882 ALERT 1 G</a> | No Datum for _diffrn_reflns_av unetI/netI .....  | Please Do !   |
| <a href="#">PLAT912 ALERT 4 G</a> | Missing # of FCF Reflections Above STh/L=        | 0.600 12 Note |
| <a href="#">PLAT978 ALERT 2 G</a> | Number C-C Bonds with Positive Residual Density. | 1 Info        |

- 0 **ALERT level A** = Most likely a serious problem - resolve or explain  
 1 **ALERT level B** = A potentially serious problem, consider carefully  
 10 **ALERT level C** = Check. Ensure it is not caused by an omission or oversight  
 11 **ALERT level G** = General information/check it is not something unexpected

- 4 ALERT type 1 CIF construction/syntax error, inconsistent or missing data  
 11 ALERT type 2 Indicator that the structure model may be wrong or deficient  
 4 ALERT type 3 Indicator that the structure quality may be low  
 2 ALERT type 4 Improvement, methodology, query or suggestion  
 1 ALERT type 5 Informative message, check

## Datablock: CoNO2L12BF4

|                    |                                        |                                  |
|--------------------|----------------------------------------|----------------------------------|
| Bond precision:    | C-C = 0.0127 Å                         | Wavelength=0.71075               |
| Cell:              | a=11.777 (3) b=15.679 (3) c=17.388 (4) |                                  |
|                    | alpha=90 beta=108.515 (4) gamma=90     |                                  |
| Temperature: 178 K |                                        |                                  |
|                    | Calculated                             | Reported                         |
| Volume             | 3044.5 (12)                            | 3044.5 (12)                      |
| Space group        | C c                                    | C 1 c 1                          |
| Hall group         | C -2yc                                 | C -2yc                           |
| Moiety formula     | C19 H32 Co N6 O2, B F4, C4 H8 O        | C23 H40 B Co F4 N6 O3            |
| Sum formula        | C23 H40 B Co F4 N6 O3                  | C23 H40 B Co F4 N6 O3            |
| Mr                 | 594.35                                 | 594.34                           |
| Dx, g cm-3         | 1.297                                  | 1.297                            |
| Z                  | 4                                      | 4                                |
| Mu (mm-1)          | 0.621                                  | 0.621                            |
| F000               | 1248.0                                 | 1248.0                           |
| F000'              | 1249.98                                |                                  |
| h, k, lmax         | 15, 20, 22                             | 15, 20, 22                       |
| Nref               | 6998 [ 3504]                           | 6765                             |
| Tmin, Tmax         | 0.917, 0.928                           | 0.768, 0.928                     |
| Tmin'              | 0.917                                  |                                  |
| Correction method= | # Reported T Limits: Tmin=0.768        |                                  |
| Tmax=0.928         | AbsCorr = NUMERICAL                    |                                  |
| Data completeness= | 1.93/0.97                              | Theta(max)= 27.484               |
| R(reflections)=    | 0.0536 ( 5753)                         | wR2(reflections)= 0.1596 ( 6765) |
| S = 0.923          | Npar= 343                              |                                  |

The following ALERTS were generated. Each ALERT has the format

**test-name\_ALERT\_alert-type\_alert-level.**

Click on the hyperlinks for more details of the test.

### Alert level B

|                                   |                                                 |              |
|-----------------------------------|-------------------------------------------------|--------------|
| <a href="#">PLAT360 ALERT 2 B</a> | Short C(sp3)-C(sp3) Bond C63 - C64              | 1.25 Ang.    |
| <a href="#">PLAT987 ALERT 1 B</a> | The Flack x is >> 0 - Do a BASF/TWIN Refinement | Please Check |

### Alert level C

|                                   |                                                  |             |
|-----------------------------------|--------------------------------------------------|-------------|
| <a href="#">PLAT094 ALERT 2 C</a> | Ratio of Maximum / Minimum Residual Density .... | 2.60 Report |
| <a href="#">PLAT213 ALERT 2 C</a> | Atom Cl8 has ADP max/min Ratio .....             | 3.4 prolat  |
| <a href="#">PLAT220 ALERT 2 C</a> | Non-Solvent Resd 1 C Ueq(max)/Ueq(min) Range     | 3.9 Ratio   |

|                                   |                                                  |                                           |         |        |
|-----------------------------------|--------------------------------------------------|-------------------------------------------|---------|--------|
| <a href="#">PLAT242 ALERT 2 C</a> | Low                                              | 'MainMol' Ueq as Compared to Neighbors of | C17     | Check  |
| <a href="#">PLAT242 ALERT 2 C</a> | Low                                              | 'MainMol' Ueq as Compared to Neighbors of | C27     | Check  |
| <a href="#">PLAT243 ALERT 4 C</a> | High                                             | 'Solvent' Ueq as Compared to Neighbors of | O61     | Check  |
| <a href="#">PLAT243 ALERT 4 C</a> | High                                             | 'Solvent' Ueq as Compared to Neighbors of | C63     | Check  |
| <a href="#">PLAT244 ALERT 4 C</a> | Low                                              | 'Solvent' Ueq as Compared to Neighbors of | C61     | Check  |
| <a href="#">PLAT244 ALERT 4 C</a> | Low                                              | 'Solvent' Ueq as Compared to Neighbors of | C62     | Check  |
| <a href="#">PLAT250 ALERT 2 C</a> | Large U3/U1 Ratio for Average U(i,j) Tensor .... |                                           | 2.1     | Note   |
| <a href="#">PLAT260 ALERT 2 C</a> | Large Average Ueq of Residue Including           | F51                                       | 0.114   | Check  |
| <a href="#">PLAT260 ALERT 2 C</a> | Large Average Ueq of Residue Including           | O61                                       | 0.143   | Check  |
| <a href="#">PLAT341 ALERT 3 C</a> | Low Bond Precision on C-C Bonds .....            |                                           | 0.01268 | Ang.   |
| <a href="#">PLAT410 ALERT 2 C</a> | Short Intra H...H Contact H63A ..H64B .          |                                           | 1.91    | Ang.   |
|                                   |                                                  | x,y,z =                                   | 1_555   | Check  |
| <a href="#">PLAT410 ALERT 2 C</a> | Short Intra H...H Contact H63B ..H64A .          |                                           | 1.92    | Ang.   |
|                                   |                                                  | x,y,z =                                   | 1_555   | Check  |
| <a href="#">PLAT910 ALERT 3 C</a> | Missing # of FCF Reflection(s) Below Theta(Min). |                                           | 7       | Note   |
| <a href="#">PLAT911 ALERT 3 C</a> | Missing FCF Refl Between Thmin & STh/L= 0.600    |                                           | 5       | Report |
| <a href="#">PLAT934 ALERT 3 C</a> | Number of (Iobs-Icalc)/SigmaW > 10 Outliers .... |                                           | 1       | Check  |
| <a href="#">PLAT978 ALERT 2 C</a> | Number C-C Bonds with Positive Residual Density. |                                           | 0       | Info   |

### Alert level G

|                                   |                                                  |        |        |
|-----------------------------------|--------------------------------------------------|--------|--------|
| <a href="#">PLAT042 ALERT 1 G</a> | Calc. and Reported MoietyFormula Strings Differ  | Please | Check  |
| <a href="#">PLAT072 ALERT 2 G</a> | SHELXL First Parameter in WGHT Unusually Large   | 0.13   | Report |
| <a href="#">PLAT244 ALERT 4 G</a> | Low 'Solvent' Ueq as Compared to Neighbors of    | B51    | Check  |
| <a href="#">PLAT398 ALERT 2 G</a> | Deviating C-O-C Angle From 120 for O61           | 109.9  | Degree |
| <a href="#">PLAT790 ALERT 4 G</a> | Centre of Gravity not Within Unit Cell: Resd. #  | 2      | Note   |
|                                   | B F4                                             |        |        |
| <a href="#">PLAT790 ALERT 4 G</a> | Centre of Gravity not Within Unit Cell: Resd. #  | 3      | Note   |
|                                   | C4 H8 O                                          |        |        |
| <a href="#">PLAT794 ALERT 5 G</a> | Tentative Bond Valency for Co1 (III) .           | 3.50   | Info   |
| <a href="#">PLAT882 ALERT 1 G</a> | No Datum for _diffrn_reflms_av_unetI/netI .....  | Please | Do !   |
| <a href="#">PLAT912 ALERT 4 G</a> | Missing # of FCF Reflections Above STh/L= 0.600  | 13     | Note   |
| <a href="#">PLAT913 ALERT 3 G</a> | Missing # of Very Strong Reflections in FCF .... | 2      | Note   |

- 0 **ALERT level A** = Most likely a serious problem - resolve or explain  
2 **ALERT level B** = A potentially serious problem, consider carefully  
19 **ALERT level C** = Check. Ensure it is not caused by an omission or oversight  
10 **ALERT level G** = General information/check it is not something unexpected

- 3 ALERT type 1 CIF construction/syntax error, inconsistent or missing data  
14 ALERT type 2 Indicator that the structure model may be wrong or deficient  
5 ALERT type 3 Indicator that the structure quality may be low  
8 ALERT type 4 Improvement, methodology, query or suggestion  
1 ALERT type 5 Informative message, check

## Datablock: FeCl2L12

|                    |                                                   |                                 |
|--------------------|---------------------------------------------------|---------------------------------|
| Bond precision:    | C-C = 0.0022 A                                    | Wavelength=0.71075              |
| Cell:              | a=8.9680(14) b=9.8986(15) c=15.939(2)             |                                 |
|                    | alpha=99.7610(17) beta=92.444(4) gamma=107.572(4) |                                 |
| Temperature:       | 178 K                                             |                                 |
|                    | Calculated                                        | Reported                        |
| Volume             | 1322.7(3)                                         | 1322.7(3)                       |
| Space group        | P -1                                              | P -1                            |
| Hall group         | -P 1                                              | -P 1                            |
| Moiety formula     | C19 H32 Cl2 Fe N4, C3 H6 O                        | C22 H38 Cl2 Fe N4 O             |
| Sum formula        | C22 H38 Cl2 Fe N4 O                               | C22 H38 Cl2 Fe N4 O             |
| Mr                 | 501.31                                            | 501.32                          |
| Dx,g cm-3          | 1.259                                             | 1.259                           |
| Z                  | 2                                                 | 2                               |
| Mu (mm-1)          | 0.791                                             | 0.790                           |
| F000               | 532.0                                             | 532.0                           |
| F000'              | 533.41                                            |                                 |
| h,k,lmax           | 11,12,20                                          | 11,12,20                        |
| Nref               | 6071                                              | 6059                            |
| Tmin,Tmax          | 0.847,0.867                                       | 0.814,0.867                     |
| Tmin'              | 0.847                                             |                                 |
| Correction method= | # Reported T Limits: Tmin=0.814                   |                                 |
| Tmax=0.867         | AbsCorr = NUMERICAL                               |                                 |
| Data completeness= | 0.998                                             | Theta(max)= 27.477              |
| R(reflections)=    | 0.0274( 5699)                                     | wR2(reflections)= 0.0755( 6059) |
| S =                | 1.054                                             | Npar= 271                       |

The following ALERTS were generated. Each ALERT has the format  
**test-name\_ALERT\_alert-type\_alert-level.**

Click on the hyperlinks for more details of the test.

### Alert level C

|                                   |                                                  |            |
|-----------------------------------|--------------------------------------------------|------------|
| <a href="#">PLAT220 ALERT 2 C</a> | Non-Solvent Resd 1 C Ueq(max)/Ueq(min) Range     | 3.3 Ratio  |
| <a href="#">PLAT242 ALERT 2 C</a> | Low 'MainMol' Ueq as Compared to Neighbors of    | C23 Check  |
| <a href="#">PLAT244 ALERT 4 C</a> | Low 'Solvent' Ueq as Compared to Neighbors of    | C41 Check  |
| <a href="#">PLAT910 ALERT 3 C</a> | Missing # of FCF Reflection(s) Below Theta(Min). | 10 Note    |
| <a href="#">PLAT911 ALERT 3 C</a> | Missing FCF Refl Between Thmin & STh/L= 0.600    | 2 Report   |
| <a href="#">PLAT977 ALERT 2 C</a> | Check Negative Difference Density on H42A        | -0.31 eA-3 |

#### And 2 other PLAT977 Alerts

|                                   |                                           |            |
|-----------------------------------|-------------------------------------------|------------|
| <a href="#">PLAT977 ALERT 2 C</a> | Check Negative Difference Density on H42B | -0.37 eA-3 |
| <a href="#">PLAT977 ALERT 2 C</a> | Check Negative Difference Density on H42C | -0.37 eA-3 |

### Alert level G

|                                   |                                                  |              |
|-----------------------------------|--------------------------------------------------|--------------|
| <a href="#">PLAT042 ALERT 1 G</a> | Calc. and Reported MoietyFormula Strings Differ  | Please Check |
| <a href="#">PLAT232 ALERT 2 G</a> | Hirshfeld Test Diff (M-X) Fe1 --Cl32 .           | 6.3 s.u.     |
| <a href="#">PLAT380 ALERT 4 G</a> | Incorrectly? Oriented X(sp2)-Methyl Moiety ..... | C42 Check    |
| <a href="#">PLAT380 ALERT 4 G</a> | Incorrectly? Oriented X(sp2)-Methyl Moiety ..... | C43 Check    |
| <a href="#">PLAT794 ALERT 5 G</a> | Tentative Bond Valency for Fe1 (II) .            | 2.03 Info    |
| <a href="#">PLAT882 ALERT 1 G</a> | No Datum for _diffrn_reflms_av_unetI/netI .....  | Please Do !  |
| <a href="#">PLAT978 ALERT 2 G</a> | Number C-C Bonds with Positive Residual Density. | 11 Info      |

- 0 **ALERT level A** = Most likely a serious problem - resolve or explain  
 0 **ALERT level B** = A potentially serious problem, consider carefully  
 8 **ALERT level C** = Check. Ensure it is not caused by an omission or oversight  
 7 **ALERT level G** = General information/check it is not something unexpected

- 2 ALERT type 1 CIF construction/syntax error, inconsistent or missing data  
 7 ALERT type 2 Indicator that the structure model may be wrong or deficient  
 2 ALERT type 3 Indicator that the structure quality may be low  
 3 ALERT type 4 Improvement, methodology, query or suggestion  
 1 ALERT type 5 Informative message, check

## Datablock: CoNO32L12

|                      |                                               |                    |
|----------------------|-----------------------------------------------|--------------------|
| Bond precision:      | C-C = 0.0040 A                                | Wavelength=0.71075 |
| Cell:                | a=16.8808(19) b=17.1117(18) c=18.875(2)       |                    |
|                      | alpha=90 beta=90 gamma=90                     |                    |
| Temperature:         | 178 K                                         |                    |
|                      | Calculated                                    | Reported           |
| Volume               | 5452.2(10)                                    | 5452.2(10)         |
| Space group          | P b c a                                       | P b c a            |
| Hall group           | -P 2ac 2ab                                    | -P 2ac 2ab         |
| Moiety formula       | C19 H32 Co N6 O6 [+ solvent]                  | C19 H32 Co N6 O6   |
| Sum formula          | C19 H32 Co N6 O6 [+ solvent]                  | C19 H32 Co N6 O6   |
| Mr                   | 499.44                                        | 499.43             |
| Dx,g cm-3            | 1.217                                         | 1.217              |
| Z                    | 8                                             | 8                  |
| Mu (mm-1)            | 0.669                                         | 0.669              |
| F000                 | 2104.0                                        | 2104.0             |
| F000'                | 2107.60                                       |                    |
| h,k,lmax             | 21,22,24                                      | 21,22,24           |
| Nref                 | 6268                                          | 6251               |
| Tmin,Tmax            | 0.930,0.980                                   | 0.919,0.980        |
| Tmin'                | 0.887                                         |                    |
| Correction method=   | # Reported T Limits: Tmin=0.919               |                    |
| Tmax=0.980 AbsCorr = | NUMERICAL                                     |                    |
| Data completeness=   | 0.997 Theta(max)= 27.509                      |                    |
| R(reflections)=      | 0.0447( 4949) wR2(reflections)= 0.1449( 6251) |                    |
| S = 1.112            | Npar= 289                                     |                    |

The following ALERTS were generated. Each ALERT has the format

**test-name\_ALERT\_alert-type\_alert-level.**

Click on the hyperlinks for more details of the test.

### Alert level B

|                                   |                                                  |         |
|-----------------------------------|--------------------------------------------------|---------|
| <a href="#">PLAT910 ALERT 3 B</a> | Missing # of FCF Reflection(s) Below Theta(Min). | 11 Note |
| <a href="#">PLAT934 ALERT 3 B</a> | Number of (Iobs-Icalc)/SigmaW > 10 Outliers .... | 6 Check |

### Alert level C

|                                   |                                              |            |
|-----------------------------------|----------------------------------------------|------------|
| <a href="#">PLAT213 ALERT 2 C</a> | Atom O43 has ADP max/min Ratio .....         | 3.6 prolat |
| <a href="#">PLAT220 ALERT 2 C</a> | Non-Solvent Resd 1 C Ueq(max)/Ueq(min) Range | 3.1 Ratio  |

[PLAT220 ALERT 2 C](#) Non-Solvent Resd 1 O Ueq(max)/Ueq(min) Range 3.8 Ratio  
[PLAT413 ALERT 2 C](#) Short Inter XH3 .. XHn H21A ..H28A . 2.09 Ang.  
 $1/2-x, -1/2+y, z = 6\_655$  Check  
[PLAT906 ALERT 3 C](#) Large K Value in the Analysis of Variance ..... 2.916 Check

### Alert level G

[PLAT232 ALERT 2 G](#) Hirshfeld Test Diff (M-X) Col --O31 . 5.3 s.u.

And 2 other PLAT232 Alerts

[PLAT232 ALERT 2 G](#) Hirshfeld Test Diff (M-X) Col --O32 . 12.3 s.u.

[PLAT232 ALERT 2 G](#) Hirshfeld Test Diff (M-X) Col --O42 . 7.4 s.u.

[PLAT605 ALERT 4 G](#) Largest Solvent Accessible VOID in the Structure 211 A\*\*3

[PLAT794 ALERT 5 G](#) Tentative Bond Valency for Col (II) . 2.00 Info

[PLAT869 ALERT 4 G](#) ALERTS Related to the Use of SQUEEZE Suppressed ! Info

[PLAT882 ALERT 1 G](#) No Datum for \_diffrn\_reflns\_av\_unetI/netI ..... Please Do !

[PLAT912 ALERT 4 G](#) Missing # of FCF Reflections Above STh/L= 0.600 6 Note

[PLAT913 ALERT 3 G](#) Missing # of Very Strong Reflections in FCF .... 1 Note

[PLAT978 ALERT 2 G](#) Number C-C Bonds with Positive Residual Density. 2 Info

- 0 **ALERT level A** = Most likely a serious problem - resolve or explain  
 2 **ALERT level B** = A potentially serious problem, consider carefully  
 5 **ALERT level C** = Check. Ensure it is not caused by an omission or oversight  
 10 **ALERT level G** = General information/check it is not something unexpected

- 1 ALERT type 1 CIF construction/syntax error, inconsistent or missing data  
 8 ALERT type 2 Indicator that the structure model may be wrong or deficient  
 4 ALERT type 3 Indicator that the structure quality may be low  
 3 ALERT type 4 Improvement, methodology, query or suggestion  
 1 ALERT type 5 Informative message, check

## Datablock: CoNO22L12

Bond precision: C-C = 0.0049 A Wavelength=0.71075

Cell: a=10.0033(15) b=17.788(3) c=16.691(3)

alpha=90 beta=94.743(4) gamma=90

Temperature: 178 K

|                | Calculated                            | Reported         |
|----------------|---------------------------------------|------------------|
| Volume         | 2959.8(9)                             | 2959.8(9)        |
| Space group    | P 21/c                                | P 1 21/c 1       |
| Hall group     | -P 2ybc                               | -P 2ybc          |
| Moiety formula | C19 H32 Co N6 O4, C4 H8 O [+ solvent] | C23 H40 Co N6 O5 |
| Sum formula    | C23 H40 Co N6 O5 [+ solvent]          | C23 H40 Co N6 O5 |
| Mr             | 539.54                                | 539.54           |
| Dx, g cm-3     | 1.211                                 | 1.211            |
| Z              | 4                                     | 4                |
| Mu (mm-1)      | 0.619                                 | 0.619            |
| F000           | 1148.0                                | 1148.0           |
| F000'          | 1149.80                               |                  |
| h, k, lmax     | 13, 23, 21                            | 13, 23, 21       |
| Nref           | 6806                                  | 6795             |
| Tmin, Tmax     | 0.956, 0.976                          | 0.704, 0.976     |
| Tmin'          | 0.934                                 |                  |

Correction method= # Reported T Limits: Tmin=0.704

Tmax=0.976 AbsCorr = NUMERICAL

Data completeness= 0.998 Theta(max)= 27.521

R(reflections)= 0.0539( 5059) wR2(reflections)= 0.1427( 6795)

S = 1.069 Npar= 316

The following ALERTS were generated. Each ALERT has the format

**test-name ALERT alert-type alert-level.**

Click on the hyperlinks for more details of the test.

### Alert level B

[PLAT230 ALERT 2 B](#) Hirshfeld Test Diff for O31 --N31 . 9.5 s.u.

[PLAT230 ALERT 2 B](#) Hirshfeld Test Diff for O32 --N31 . 16.0 s.u.

### Alert level C

[PLAT230 ALERT 2 C](#) Hirshfeld Test Diff for O42 --N41 . 7.0 s.u.

[PLAT241 ALERT 2 C](#) High 'MainMol' Ueq as Compared to Neighbors of O32 Check

[PLAT241 ALERT 2 C](#) High 'MainMol' Ueq as Compared to Neighbors of O41 Check

[PLAT242 ALERT 2 C](#) Low 'MainMol' Ueq as Compared to Neighbors of Col Check

|                                   |                                                  |           |                                 |       |       |
|-----------------------------------|--------------------------------------------------|-----------|---------------------------------|-------|-------|
| <a href="#">PLAT242 ALERT 2 C</a> | Low                                              | 'MainMol' | Ueq as Compared to Neighbors of | C17   | Check |
| <a href="#">PLAT243 ALERT 4 C</a> | High                                             | 'Solvent' | Ueq as Compared to Neighbors of | C51   | Check |
| <a href="#">PLAT243 ALERT 4 C</a> | High                                             | 'Solvent' | Ueq as Compared to Neighbors of | C53   | Check |
| <a href="#">PLAT244 ALERT 4 C</a> | Low                                              | 'Solvent' | Ueq as Compared to Neighbors of | O51   | Check |
| <a href="#">PLAT244 ALERT 4 C</a> | Low                                              | 'Solvent' | Ueq as Compared to Neighbors of | C52   | Check |
| <a href="#">PLAT906 ALERT 3 C</a> | Large K Value in the Analysis of Variance .....  |           |                                 | 2.092 | Check |
| <a href="#">PLAT910 ALERT 3 C</a> | Missing # of FCF Reflection(s) Below Theta(Min). |           |                                 | 9     | Note  |

### Alert level G

|                                   |                                                  |        |        |
|-----------------------------------|--------------------------------------------------|--------|--------|
| <a href="#">PLAT042 ALERT 1 G</a> | Calc. and Reported MoietyFormula Strings Differ  | Please | Check  |
| <a href="#">PLAT232 ALERT 2 G</a> | Hirshfeld Test Diff (M-X) Col --032 .            | 9.6    | s.u.   |
| <a href="#">PLAT232 ALERT 2 G</a> | Hirshfeld Test Diff (M-X) Col --042 .            | 8.4    | s.u.   |
| <a href="#">PLAT398 ALERT 2 G</a> | Deviating C-O-C Angle From 120 for O51           | 108.2  | Degree |
| <a href="#">PLAT605 ALERT 4 G</a> | Largest Solvent Accessible VOID in the Structure | 138    | A**3   |
| <a href="#">PLAT794 ALERT 5 G</a> | Tentative Bond Valency for Col (II) .            | 1.96   | Info   |
| <a href="#">PLAT869 ALERT 4 G</a> | ALERTS Related to the Use of SQUEEZE Suppressed  | !      | Info   |
| <a href="#">PLAT882 ALERT 1 G</a> | No Datum for _diffrn_reflns_av unetI/netI .....  | Please | Do !   |
| <a href="#">PLAT912 ALERT 4 G</a> | Missing # of FCF Reflections Above STh/L= 0.600  | 2      | Note   |
| <a href="#">PLAT913 ALERT 3 G</a> | Missing # of Very Strong Reflections in FCF .... | 1      | Note   |
| <a href="#">PLAT978 ALERT 2 G</a> | Number C-C Bonds with Positive Residual Density. | 2      | Info   |

- 0 **ALERT level A** = Most likely a serious problem - resolve or explain  
 2 **ALERT level B** = A potentially serious problem, consider carefully  
 11 **ALERT level C** = Check. Ensure it is not caused by an omission or oversight  
 11 **ALERT level G** = General information/check it is not something unexpected
- 2 ALERT type 1 CIF construction/syntax error, inconsistent or missing data  
 11 ALERT type 2 Indicator that the structure model may be wrong or deficient  
 3 ALERT type 3 Indicator that the structure quality may be low  
 7 ALERT type 4 Improvement, methodology, query or suggestion  
 1 ALERT type 5 Informative message, check

It is advisable to attempt to resolve as many as possible of the alerts in all categories. Often the minor alerts point to easily fixed oversights, errors and omissions in your CIF or refinement strategy, so attention to these fine details can be worthwhile. In order to resolve some of the more serious problems it may be necessary to carry out additional measurements or structure refinements. However, the purpose of your study may justify the reported deviations and the more serious of these should normally be commented upon in the discussion or experimental section of a paper or in the "special\_details" fields of the CIF. checkCIF was carefully designed to identify outliers and unusual parameters, but every test has its limitations and alerts that are not important in a particular case may appear. Conversely, the absence of alerts does not guarantee there are no aspects of the results needing attention. It is up to the individual to critically assess their own results and, if necessary, seek expert advice.

### Publication of your CIF in IUCr journals

A basic structural check has been run on your CIF. These basic checks will be run on all CIFs submitted for publication in IUCr journals (*Acta Crystallographica*, *Journal of Applied Crystallography*, *Journal of Synchrotron Radiation*); however, if you intend to submit to *Acta Crystallographica Section C* or *E* or *IUCrData*, you should make sure that [full publication checks](#) are run on the final version of your CIF prior to submission.

### Publication of your CIF in other journals

Please refer to the *Notes for Authors* of the relevant journal for any special instructions relating to CIF submission.

PLATON version of 03/05/2019; check.def file version of 29/04/2019

## Datablock FeNO2L12BF4 - ellipsoid plot

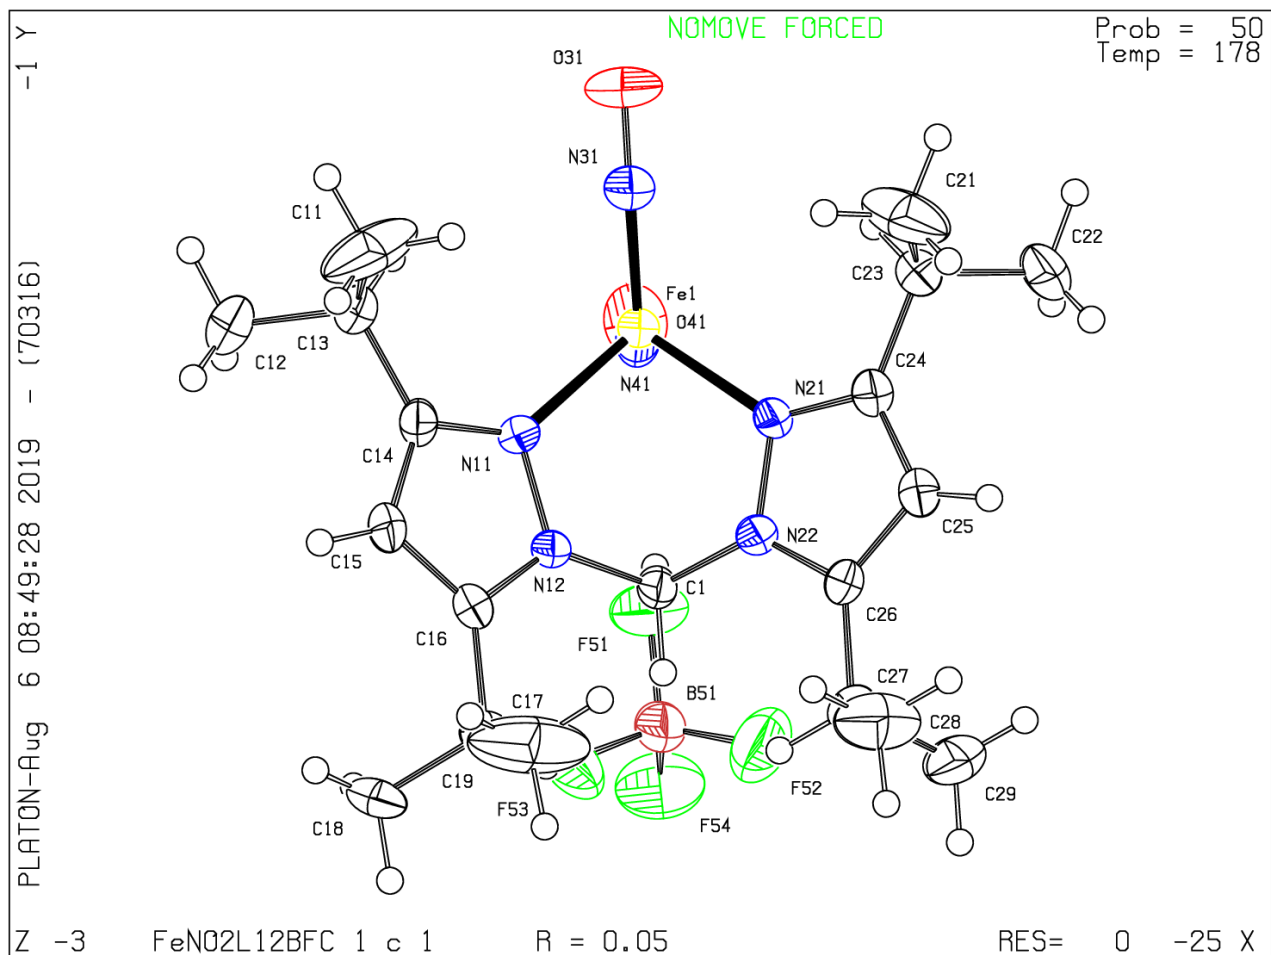

### Datablock CoNO2L12BF4 - ellipsoid plot



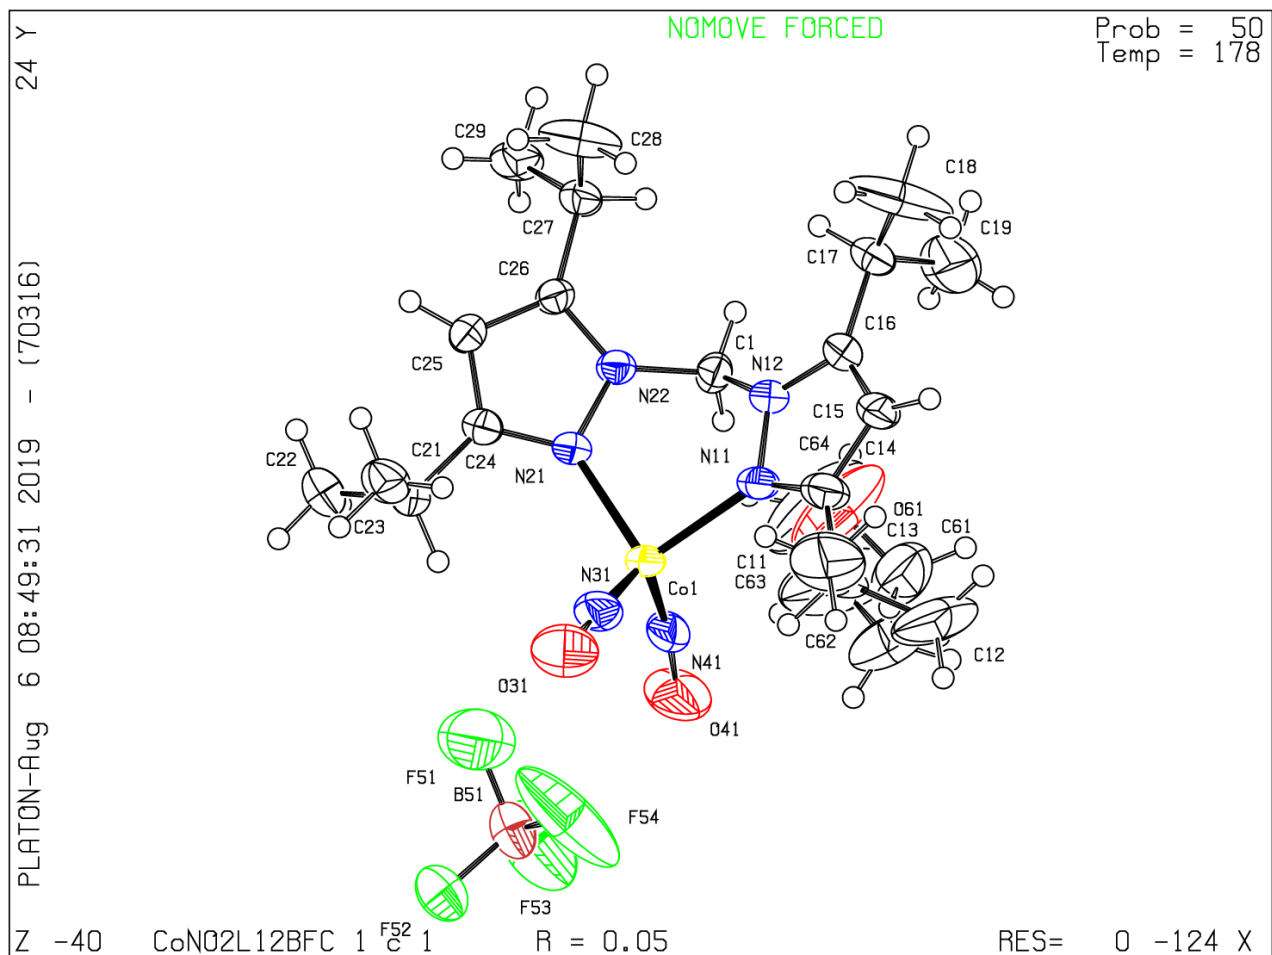

## Datablock FeCl2L12 - ellipsoid plot



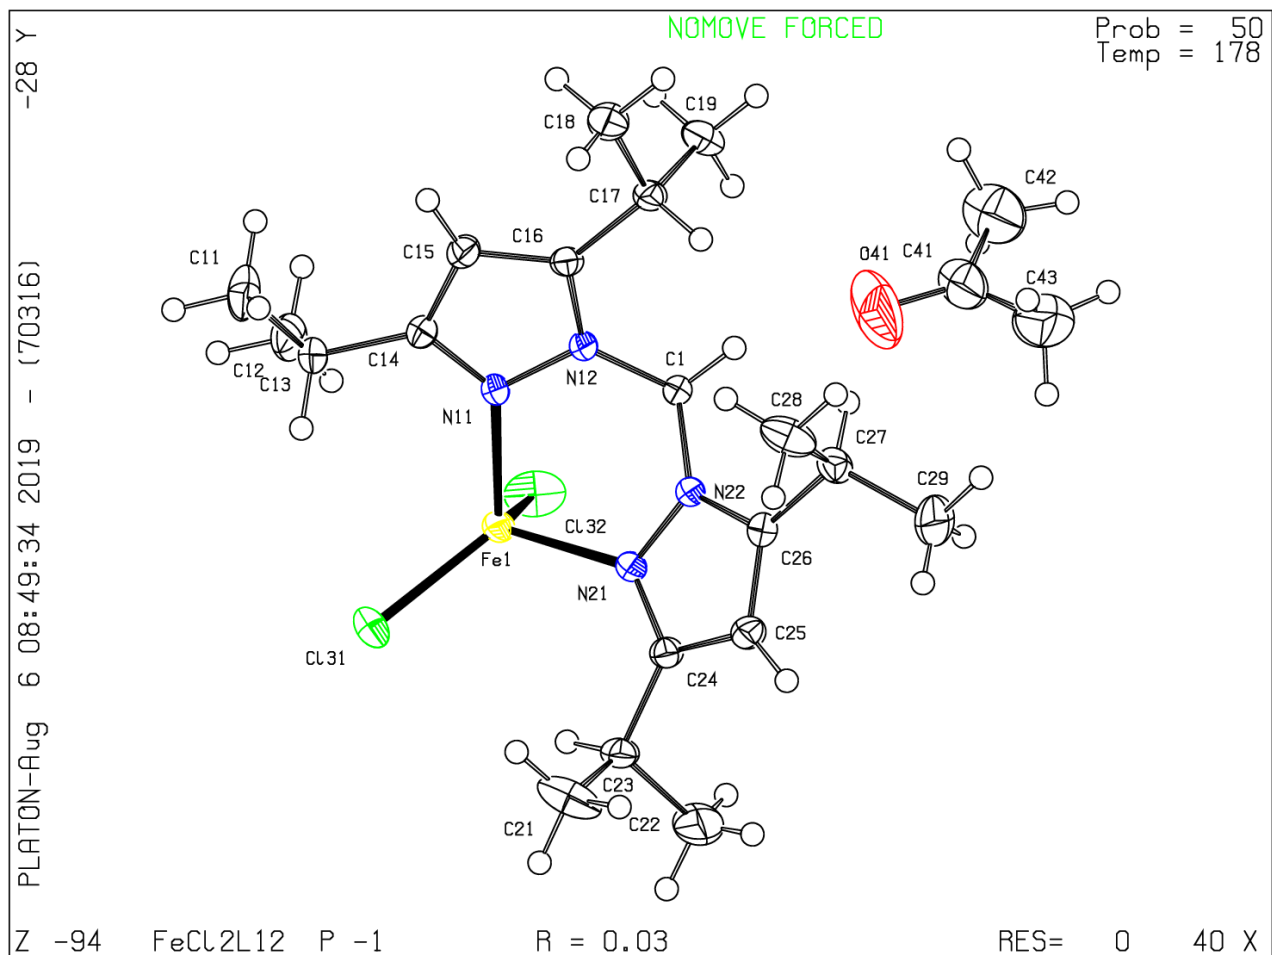

### Datablock CoN032L12 - ellipsoid plot

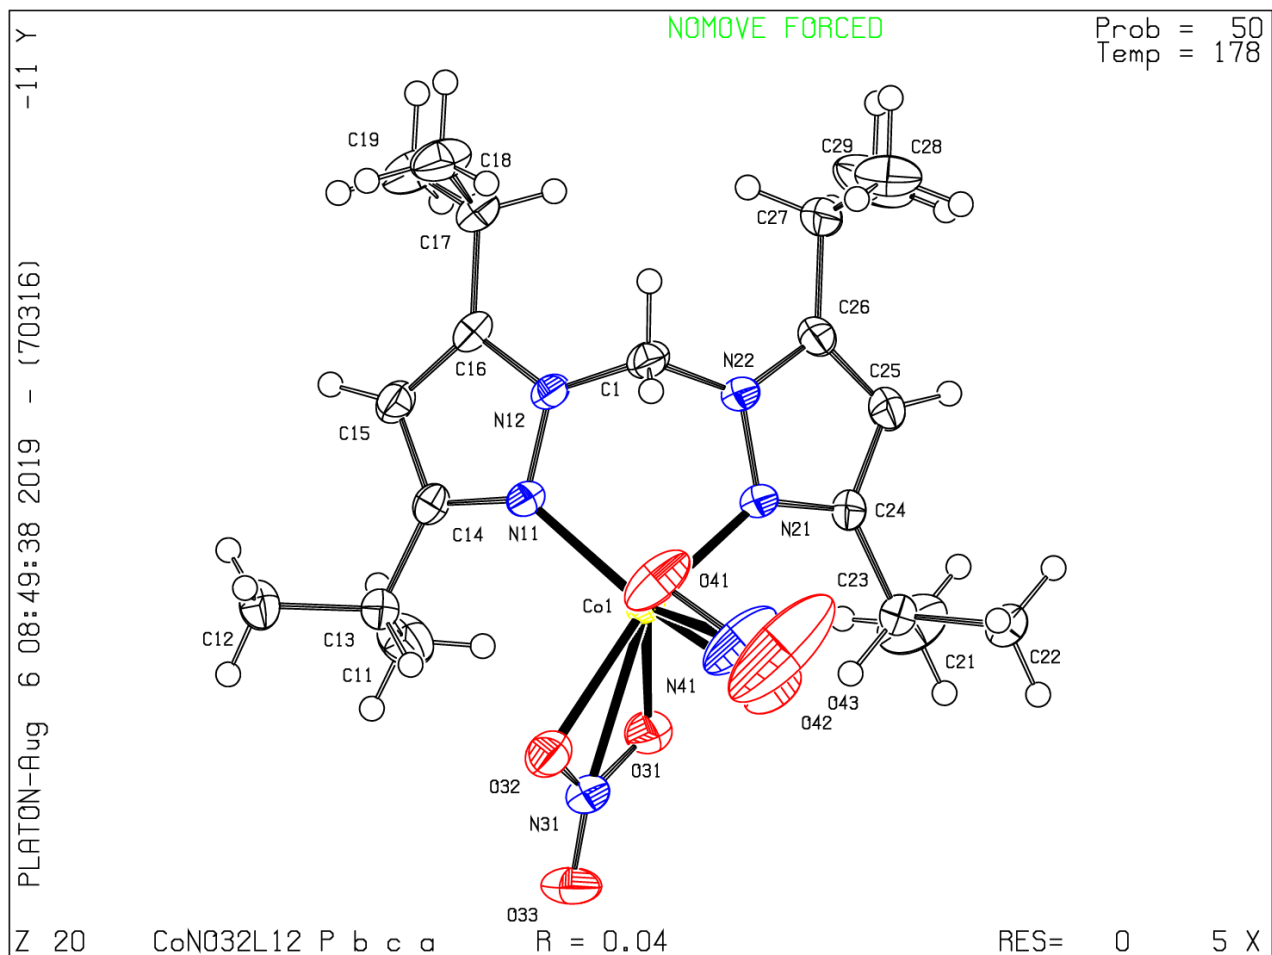

## Datablock CoNO22L12 - ellipsoid plot

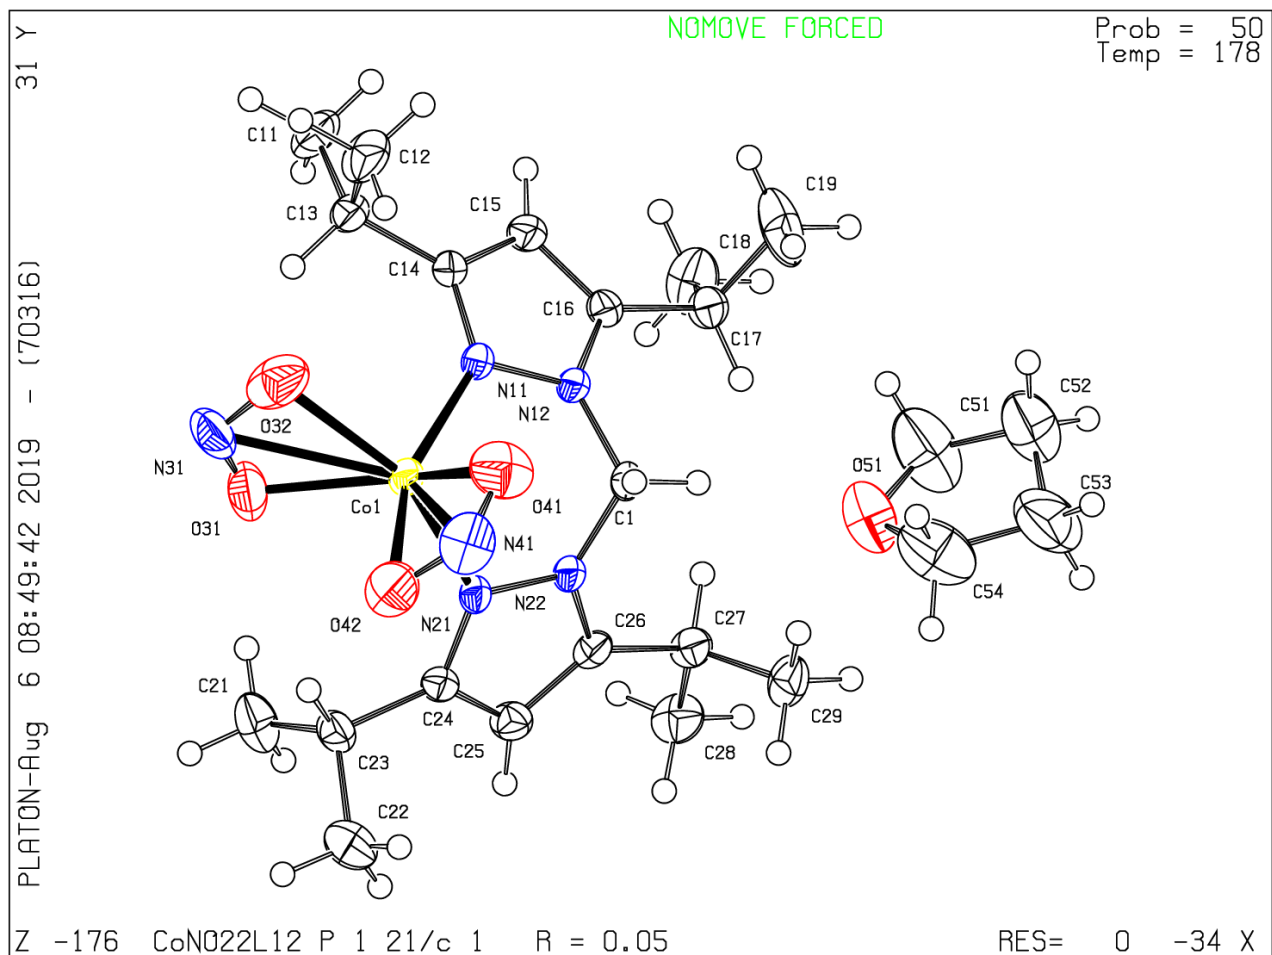

[Download CIF editor \(publCIF\) from the IUCr](#)  
[Download CIF editor \(enCIFer\) from the CCDC](#)  
[Test a new CIF entry](#)
